# Supplementary material for: Determination of the Personal Nutritional Status of Elderly Populations Based on Basic Foodomics Elements
Source: MDPI journal article supplement (doi:10.3390/foods10102391), 2021-10-09
Supplement: s1 [file s1]

## Questionere S1

*An individualized questionnaire prepared according to the guidelines of standardized methods for assessing the nutritional status of the elderly for research purposes*

1. Gender of respondents:
2. Age of respondents:
3. Body height of respondents:
4. Bodyweight of respondents:
5. BMI (Body mass index) of respondents:
6. Your weight loss occurred in the past:
  - a) 1 month
  - b) 2 months
  - c) 3 months
  - d) No loss of body weight
7. Weight lost in the past 3 months:
  - a) < 5 kg
  - b) 5 kg
  - c) more than 5 kg
  - d) 0 kg
8. Weight loss in your diet has been due to:
  - a) illness
  - b) change of residence (environment)
  - c) loss of a loved person
  - d) independent life
  - e) loss of taste and smell
  - f) nothing
9. Do you take more than 3 types of medication?
  - a) yes
  - b) no
10. Does taking medication/therapy affect your weight loss?
  - a) yes
  - b) no

11. Are you physically active (eg walking...)?

a) yes

b) no

12. The number of daily meals:

a) 2

b) 3

c) more than 3

13. How much water/liquid do you drink daily?

a) less than 1-liter

b) 1-liter

c) more than 1 liter

14. How often do you consume protein and fat (meat, fish, legumes, fats)?

a) every day

b) several times a week

c) once a week

15. How often do you consume milk and dairy products?:

a) every day

b) several times a week

c) once a week

d) I do not consume

16. How often do you consume carbohydrates (bread, pasta, cakes)?:

a) every day

b) several times a week

c) once a week

17. How often do you consume vegetables?:

a) every day

b) several times a week

c) once a week

18. How often do you consume fruits?

a) every day

b) several times a week

c) once a week

19. Metabolic needs due to disease:

- a) Do you have an increased need to eat a certain food?
- b) is there a prescribed diet due to the disease?
- c) no metabolic needs

20. Have you recently reduced in your diet the intake of:

- a) protein and fat
- b) milk, dairy products
- c) carbohydrates
- d) vegetables
- e) fruits
- f) nothing

21. How long does such a change in your diet last):

- a) 3 months
- b) 6 months
- c) 12 months
- d) no change

22. Has your current state of health affected the change in your diet recently?

- a) yes
- b) no
- c) I can't estimate, I don't know

23. Do you have problems with:

- a) nausea
- b) vomiting
- c) diarrhoea
- d) digestive tract constipation
- e) nothing

24. Level of independence in consuming meals:

- a) complete independence
- b) partial independence

Figure S1

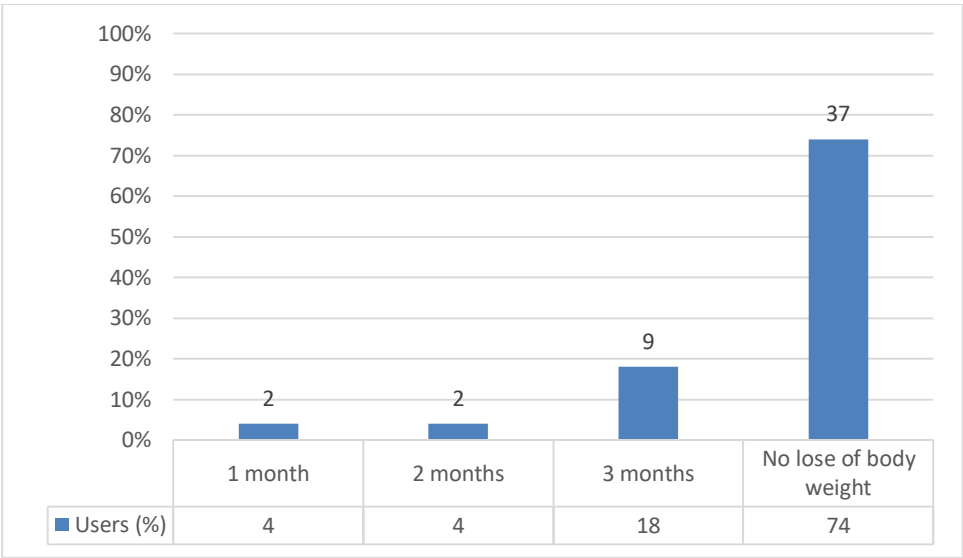

Distribution of users according to weight loss over a period of 1 month, 2 months and 3 months in absolute and relative terms.

Figure S2

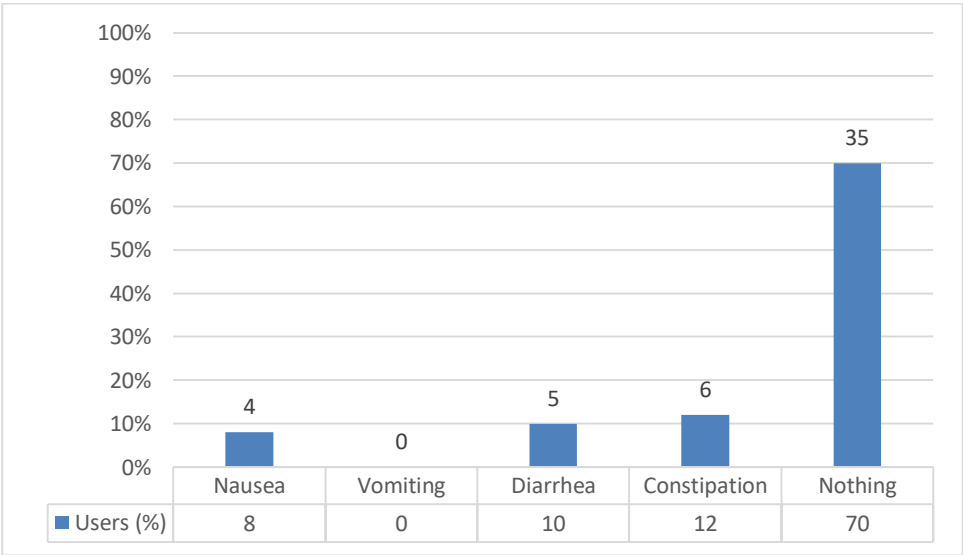

Rewiev of the user's response to a question about the presence of gastrointestinal symptoms in absolute and relative terms

Figure S3

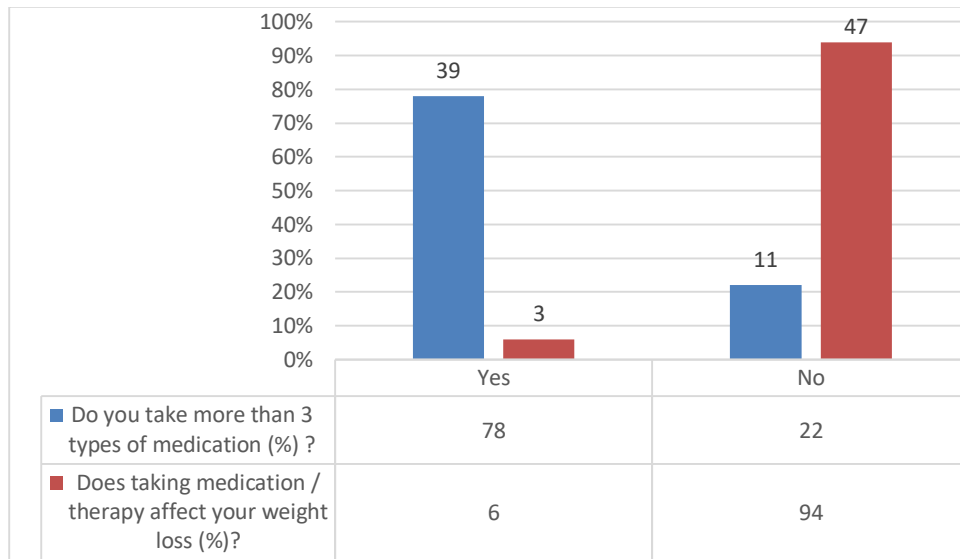

Rewiev of user's response to a question about taking medication and the effect of therapy on weight loss in absolute and relative terms

Figure S4

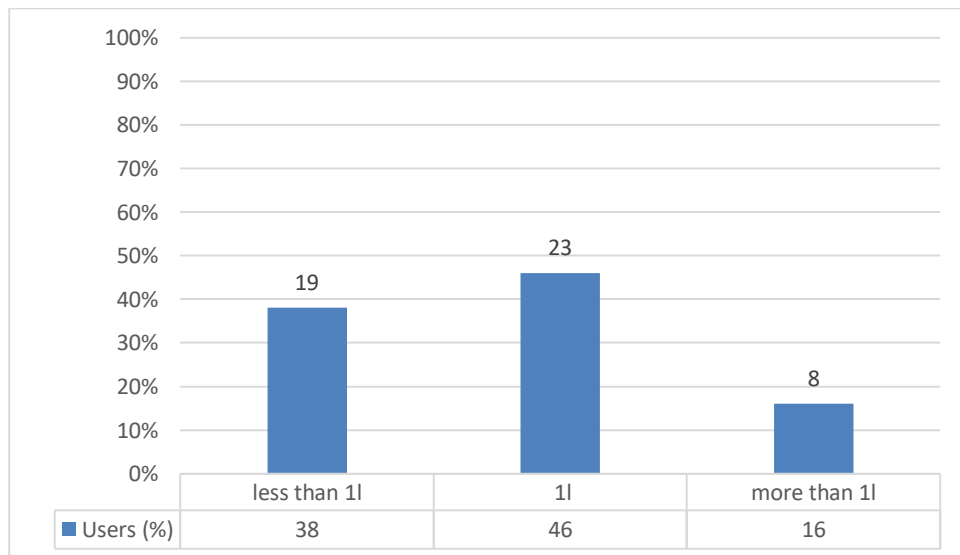

Distribution of users according to fluid intake daily in absolute and relative terms

Figure S5

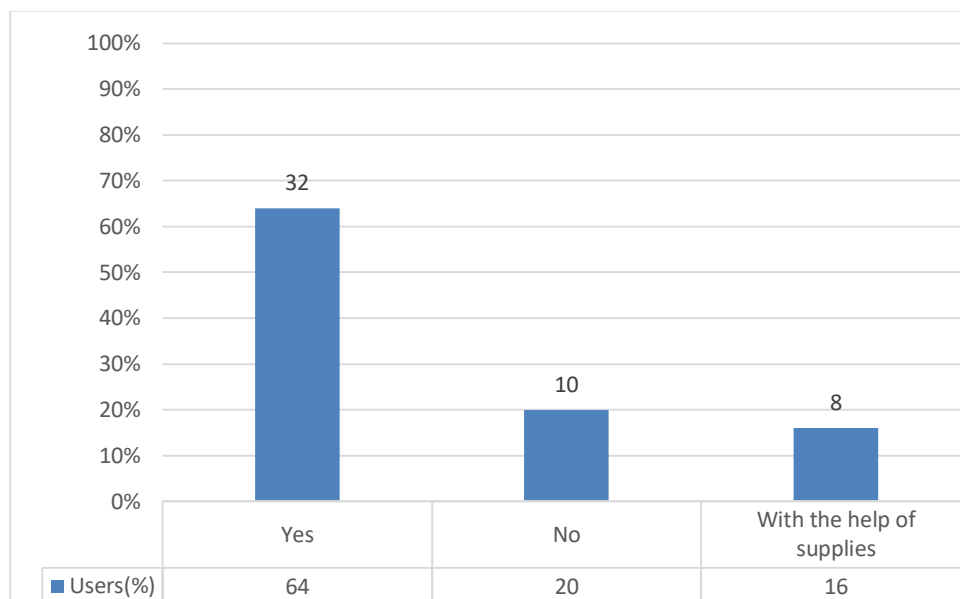

Review user's response to a question: Are you physically active? in absolute and relative terms

Table S1

The menu  
of nursing  
home  
used for  
research

| DAY         | MELAS     | STANDARD DIET                                                  | THE GALLBLADDER DIET                                           | DIABETIC DIET                                                  | MUSHY DIET                                                     |
|-------------|-----------|----------------------------------------------------------------|----------------------------------------------------------------|----------------------------------------------------------------|----------------------------------------------------------------|
| M<br>O<br>N | BREAKFAST | Cocoa, mixed tea, melted cheese                                | Cocoa, mixed tea, melted cheese                                | Cocoa, mixed tea, melted cheese                                | Cocoa                                                          |
|             | LUNCH     | Paste, bean, sausage                                           | Cauliflower stew, potato, sausage                              | Paste, bean, sausage                                           | Cauliflower stew, potato, sausage                              |
|             | DINNER    | Baked dough, mixed tea                                         | Baked dough, mixed tea                                         | Baked dough, mixed tea                                         | Baked dough, milk                                              |
|             | SNACK     | /                                                              | /                                                              | Yogurt 0,9%, Kefir                                             | /                                                              |
| T<br>U<br>E | BREAKFAST | White coffee, mixed tea, pašteta                               | White coffee, mixed tea, butter                                | White coffee, mixed tea, butter                                | Cornflakes                                                     |
|             | LUNCH     | Beef soup, stewed cabbage, boiled pork, mashed potatoes, donut | Beef soup, stewed cabbage, boiled pork, mashed potatoes, donut | Beef soup, stewed cabbage, boiled pork, mashed potatoes, donut | Beef soup, stewed cabbage, boiled pork, mashed potatoes, donut |
|             | DINNER    | Rice on milk, scrambled egg soup, cookies petit                | Rice on milk, cookies petit                                    | Rice on milk, cookies petit                                    | Rice on milk, cookies petit                                    |
|             | SNACK     | /                                                              | /                                                              | Yogurt 0,9%, sour milk                                         | /                                                              |
| W<br>E<br>N | BREAKFAST | Cocoa, mixed tea, butter and marmalade                         | Cocoa, mixed tea, butter and marmalade                         | Cocoa, mixed tea, butter and marmalade                         | Cocoa                                                          |
|             | LUNCH     | Vegetable stew, poppy pads                                     | Vegetable stew, apple pads                                     | Vegetable stew, apple pads                                     | Vegetable stew                                                 |
|             | DINNER    | Dumplings with cheese, mixed tea                               | Dumplings with cheese, mixed tea                               | Dumplings with cheese, mixed tea                               | Dumplings with cheese, milk                                    |
|             | SNACK     | /                                                              | /                                                              | Kefir, melted cheese                                           | /                                                              |
| T<br>H<br>U | BREAKFAST | White coffee, mixed tea, LinoLada                              | White coffee, mixed tea, butter                                | White coffee, mixed tea, butter                                | White cofee                                                    |
|             | LUNCH     | Beef soup, lasagne with beef, green salad                      | Beef soup, lasagne with beef, green salad                      | Beef soup, lasagne with beef, green salad                      | Beef soup, lasagne with beef, green salad, stewed cabbage      |
|             | DINNER    | Millet porridge soup, an apple                                 |
|             | SNACK     | /                                                              | /                                                              | Sour milk, cookies petit                                       | /                                                              |
| F<br>R<br>I | BREAKFAST | Cocoa, mixed tea, fresh cheese                                 | Cocoa, mixed tea, fresh cheese                                 | Cocoa, mixed tea, fresh cheese                                 | Cocoa                                                          |
|             | LUNCH     | Vegetable soup,breaded fish steak, baked cheese, potato salad  | Vegetable soup,breaded fish steak, baked cheese, potato salad  | Vegetable soup,breaded fish steak, baked cheese, potato salad  | Vegetable soup,breaded fish steak, baked cheese, salt potato   |
|             | DINNER    | White cofee, yogurt 0,9%, corn mixed spirits                   | White cofee, yogurt 0,9%, corn mixed spirits                   | White cofee, yogurt 0,9%, corn mixed spirits                   | White cofee, corn mixed spirits                                |
|             | SNACK     | /                                                              | /                                                              | Yogurt 0,9%, an orange                                         | /                                                              |
| S<br>A<br>T | BREAKFAST | White cofee, mixed tea, butter and honey                       | White cofee, mixed tea, butter and honey                       | White cofee, mixed tea, butter and honey                       | Cornflakes                                                     |
|             | LUNCH     | Beef soup, cabbage stew, mashed potato                         |
|             | DINNER    | Chicken soup, an orange                                        |
|             | SNACK     | /                                                              | /                                                              | Sour milk, kefir                                               | /                                                              |
| S<br>U<br>N | BREAKFAST | White cofee, mixed tea, ham                                    | White cofee, mixed tea, ham                                    | White cofee, mixed tea, ham                                    | White cofee                                                    |
|             | LUNCH     | Beef soup, roast chicken, grinders, green salat, puding cake   | Beef soup, roast chicken, grinders, green salat, puding cake   | Beef soup, roast chicken, grinders, green salat, puding cake   | Beef soup, roast chicken, grinders, stewed cabbage             |
|             | DINNER    | Apple pie, mixed tea, Yogurt 2,8%                              | Apple pie, mixed tea, Yogurt 2,8%                              | Apple pie, mixed tea, Yogurt 2,8%                              | Cokolino, mixed tea, Yogurt 2,8%                               |
|             | SNACK     | /                                                              | /                                                              | Yogurt 0,9%, sour milk                                         | /                                                              |

Figure S6

**QS**  
**QUALITY SERVICE**

# CERTIFICATE

Certificate no. 12792

**CARITASOV DOM ZA STARIJE I NEMOĆNE  
OSOBE "SVETI IVAN KRSTITELJ"**  
Kukuljevićeva 8  
HR-42240 Ivanec, Croatia

QS Zürich AG has been assessed and confirms hereby that the above specified enterprise has introduced and effectively uses a HACCP concept according to the international Codex Alimentarius

**HACCP**  
CAC/RCP 1-1969, REV. 4 (2003)  
Recommended International Code of Practice - General Principles of Food Hygiene

The management system includes:

**Preparing and serving food and drinks**

During the period of validity of this certificate, the management system of the company must always comply with the requirements of the certified standards.

For updated amendments within the scope of certification of the present certificate, please refer to  
<http://www.quality-service.ch/>



|                                    |            |
|------------------------------------|------------|
| Audit date:                        | 29.09.2010 |
| Date of issue:                     | 07.10.2019 |
| Expiration date:                   | 28.09.2022 |
| Subject to successful annual audit |            |

**QS Zürich AG**  
P.O. Box 6335  
CH-8050 Zürich  
[info@quality-service.ch](mailto:info@quality-service.ch)



  
Management
